# Supplementary material
Source: MDPI journal article supplement (https://www.mdpi.com/2311-5637/9/4/384)
Supplement: s1 [file s1]

# Supplementary Material - Figure S1

Article

## Non-conventional sucrose-based substrates: development of non-dairy kefir beverages with probiotic potential

Pedro Paulo Lordelo Guimarães Tavares, Clariane Teixeira Pessoa Mamona, Renata Quartieri Nascimento, Emanuele Araújo dos Anjos, Carolina Oliveira de Souza, Rogéria Comastri de Castro Almeida, Maria Eugênia de Oliveira Mamede and Karina Teixeira Magalhães-Guedes

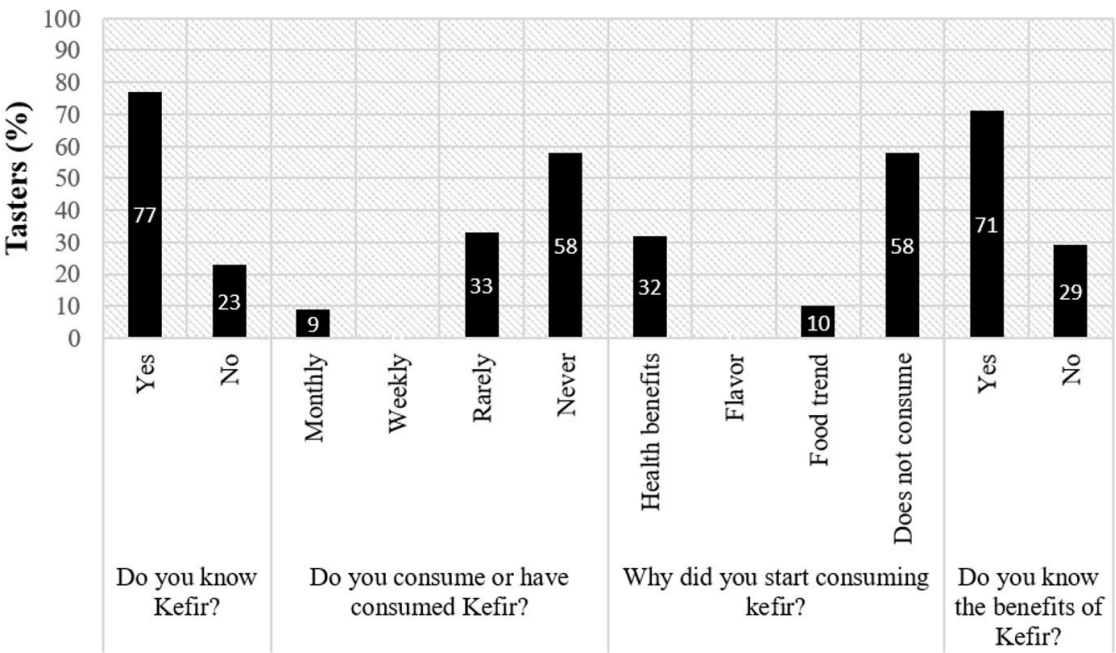

Figure S1. Percentage of respondents who know kefir.
